# Supplementary material
Source: Royal Society of Chemistry journal article supplement (doi:10.1039/d6cc01254j)
Supplement: d6cc01254j1.pdf [file d6cc01254j1.pdf]

## Supporting Information

# **Understanding alkali cation regulation of oxygen evolution on nickel (oxy)hydroxide**

Yi Wei<sup>a</sup>, Ling Li<sup>a</sup>, Miao Fan<sup>a</sup>, Jinyan Xiong<sup>b</sup>, Weijie Li<sup>c</sup>, and Chao Han<sup>a\*</sup>

<sup>a</sup>.School of Materials Science and Engineering, Central South University, Changsha 410083, P. R. China.

<sup>b</sup>.College of Chemistry and Chemical Engineering, Wuhan Textile University, Wuhan 430200, P. R. China.

<sup>c</sup>.Powder Metallurgy Research Institute, Central South University, Changsha 410083, P. R. China.

E-mail: [Chaohan@csu.edu.cn](mailto:Chaohan@csu.edu.cn) (Corresponding author: Chao Han).

## **Experimental section**

### **Materials Preparation.**

The flower shaped  $\text{NiO}_x\text{H}_y$  microsphere is synthesized by a simple hydrothermal method. Typically, 1 mmol nickel chloride hexahydrate, 10 mmol urea, and 5 mmol ammonium fluoride are added into 60 mL DI water and stirred until the homogeneous solution was formed. Subsequently, the solution was transferred into a 100 mL Teflon-lined autoclave and heated in an electric oven at 120 °C for 4 h. After cooling down to room temperature, the precipitate was collected by centrifugation and washed 3 times each with both deionized water and ethanol, and then dried at 60 °C for 12 h for further characterization and use. The purity of nickel chloride hexahydrate, lithium hydroxide, sodium hydroxide, and potassium hydroxide chemicals are all in electronic grade from Aladdin® Scientific.

### **Characterization.**

Powder X-ray diffraction (XRD) data were recorded using a Rigaku Smartlab diffractometer with  $\text{Cu-K}\alpha$  (0.15406 nm) operated at 40 kV and 40 mA at a scan rate of  $4^\circ \text{ min}^{-1}$ . X-ray photoelectron spectroscopy (XPS) analyses were operated with an AXIS-NOVA (Kratos) X-ray photoelectron spectrometer using a monochromated Al K $\alpha$  X-ray source ( $h\nu = 1486.6 \text{ eV}$ ) operated at 150 W under a base pressure of  $2.6 \times 10^{-9}$  Torr. Binding energies were calibrated by setting C 1s peak to 284.6 eV. The XPS spectra were deconvoluted using the curve fitting program, CasaXPS. The scanning electron microscopy (SEM) images were obtained using a Hitachi S-4800 microscope operated at an acceleration voltage of 10 kV. The transmission electron microscope (TEM), high-resolution transmission electron microscope (HR-TEM) and scanning TEM (STEM), as well as EDS spectra and elemental mapping, were obtained using a Hitachi HF-3300. Raman spectroscopy was recorded on the Renishaw inVia Raman microscope under an excitation of 532 nm laser under controlled potentials by a potentiostat (Gamry interface 1010). The electrolytic cell was homemade by quartz glass as the cover to protect the objective. The working electrode was set to keep the plane of the sample perpendicular to the incident laser. Pt wire as the counter electrode, and  $\text{Ag/AgCl}_{(\text{sat. KCl})}$  as reference electrolyte. In-situ attenuated reflection-surface enhanced infrared absorption spectroscopy (ATR-SEIRAS) was recorded on PerkinElmer spectrometers.

## Electrochemical measurements.

The electrochemical characterizations were carried out with a potentiostat (Gamry Interface 1010) at room temperature in alkaline electrolyte using a three-electrode configuration with Pt wire as the counter electrode, an Ag/AgCl (saturated KCl) as the reference electrode and a glassy carbon (3 mm) loaded with catalyst as the working electrode. 5 mg of catalyst was added into 800  $\mu\text{L}$  deionized water, 175  $\mu\text{L}$  isopropanol, and 25  $\mu\text{L}$  5wt% Nafion mixed under ultrasonic dispersion for 20 mins. Then, the 2  $\mu\text{L}$  suspension was dropped on a glassy carbon electrode and slowly dried. The pH values of all the alkaline solution (LiOH, NaOH and KOH) are 13.0. The cyclic voltammetry (CV) curves were recorded with a scan rate of 20  $\text{mV s}^{-1}$  in Ar-saturated alkaline electrolyte. The electrochemical impedance spectroscopy (EIS) measurements were carried out in the frequency range of 100 kHz to 0.1 Hz. Double-layer capacitance ( $C_{dl}$ ) was calculated by performing CV measurements at different scan rates of 20, 40, 60, 80 and 100  $\text{mV s}^{-1}$  in the potential range of 0.977 - 1.077 V (vs RHE). The value of  $C_{dl}$  was obtained from plotting  $\Delta j = j_a - j_c$  at 1.027 V vs RHE against the scan rates ( $j_a$  and  $j_c$  are anode and cathode current density, respectively).

## Calculated Condition(Method):

All calculations were performed with the plane-wave DFT method as implemented in the Vienna ab initio simulation package (VASP). The projector augmented wave (PAW) method was used to describe the core and valence electrons. The Perdew–Burke–Ernzerhof (PBE) form of the generalized gradient approximation was employed to describe electron exchange and correlation. Calculations proceed by a  $2 \times 2$  Ni(core shell) supercell with periodic boundary conditions. A kinetic energy cutoff of 600 eV was set in all structural relaxation simulations and the convergence criterion for the electronic self-consistent iteration is set to  $10^{-5}$  eV. A gamma centered  $6 \times 6 \times 1$  k-point mesh was used for the Brillouin zone. In all cases, structural relaxations were performed using a conjugate gradient algorithm until forces on all atoms were below 0.01 eV/Å. All calculations were performed with spin polarization.

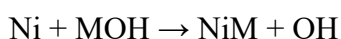

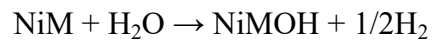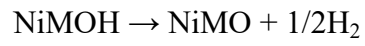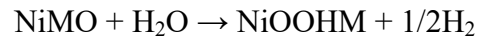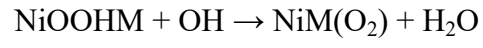

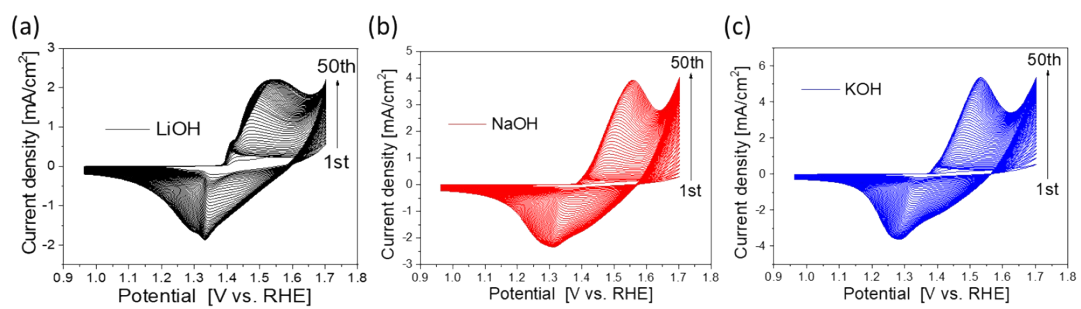

**Figure S1.** The initial CV activation curves of  $\text{NiO}_x\text{H}_y$  at the scan rate of  $20 \text{ mV s}^{-1}$  in (a) LiOH, (b) NaOH, and (c) KOH.

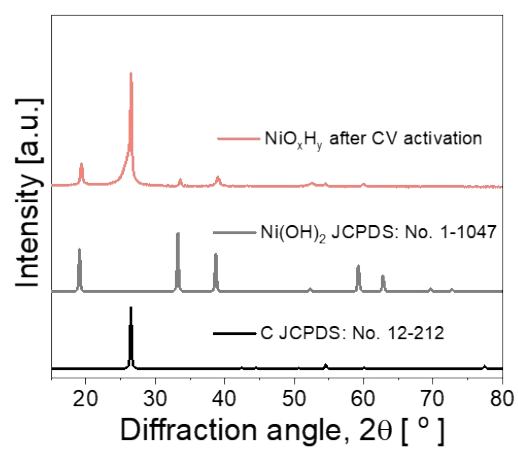

**Figure S2.** XRD patterns of NiO<sub>x</sub>H<sub>y</sub> after CV cycles in KOH electrolyte. The sample was loaded on carbon paper for XRD measurement.

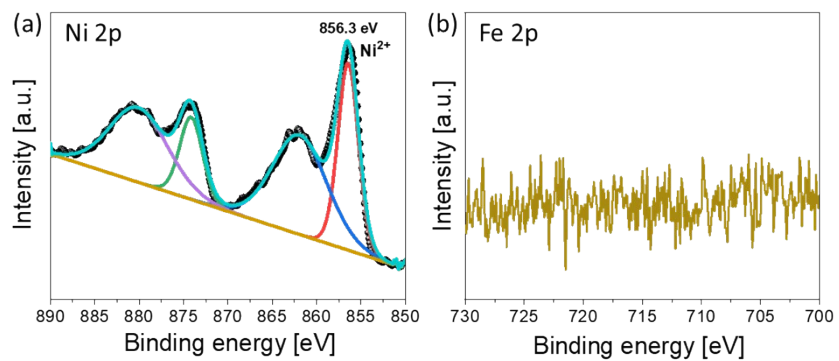

**Figure S3.** XPS spectra of (a) Ni 2p and (b) Fe 2p from NiO<sub>x</sub>H<sub>y</sub> after CV cycles in KOH electrolyte.

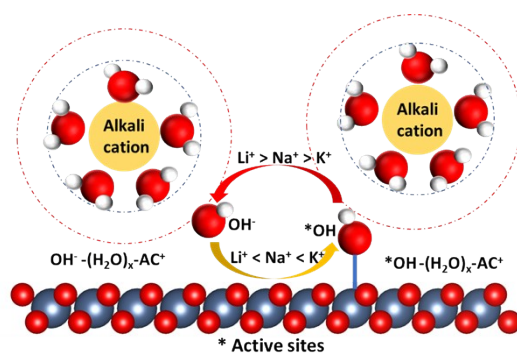

**Figure S4.** Illustration of alkali cation impact on \*OH formation from OH<sup>-</sup>.

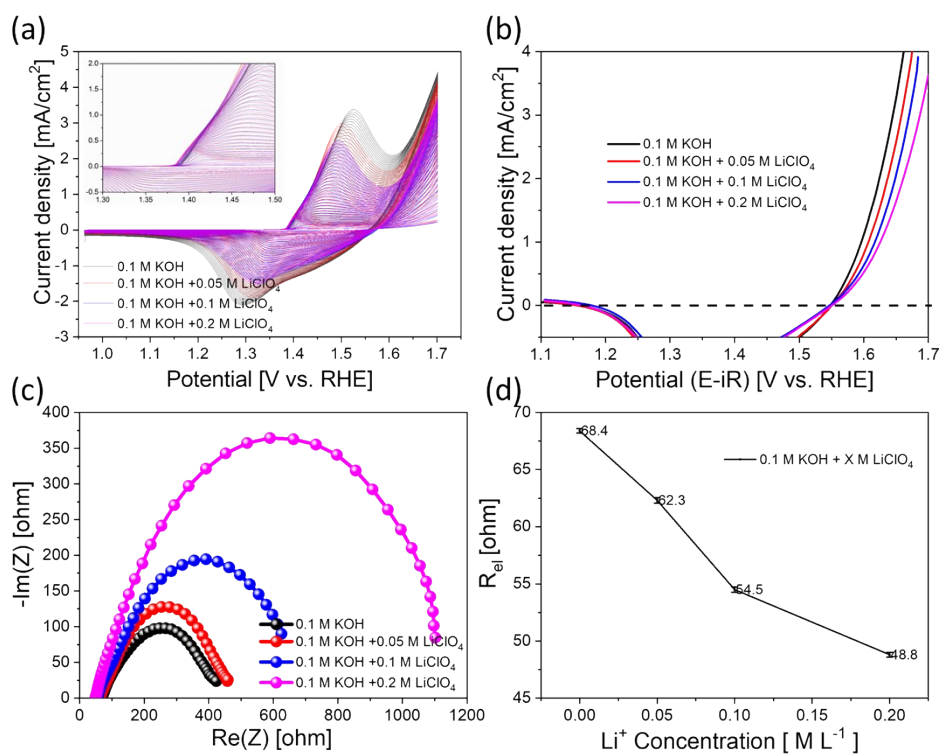

**Figure S5.** (a) CV curves of  $\text{NiO}_x\text{H}_y$  (b) backward CV, (c) EIS spectra (at 1.75 V vs RHE) of  $\text{NiO}_x\text{H}_y$  measured in 0.1 M KOH with different concentration of  $\text{LiClO}_4$ , (d) electrolyte resistances obtained from EIS spectra.

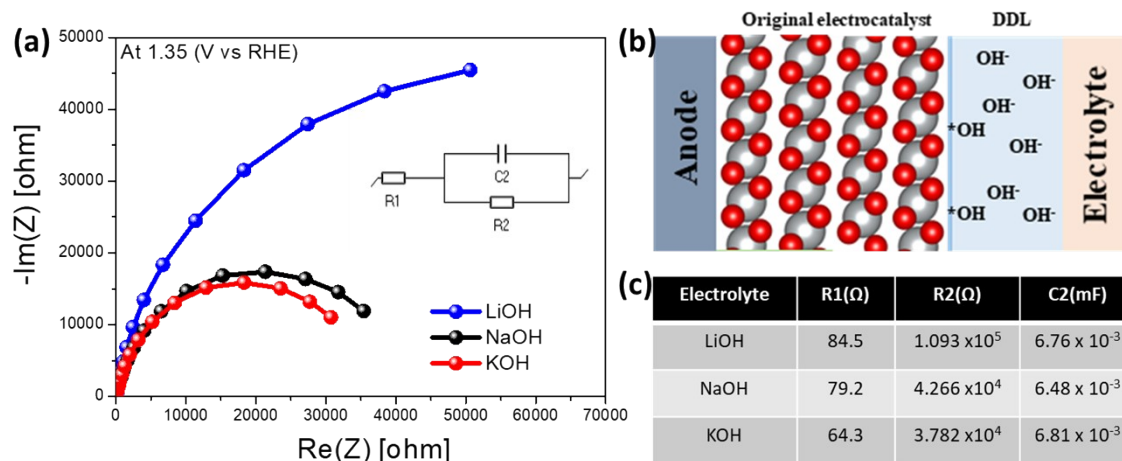

**Figure S6.** (a) EIS spectra of  $\text{NiO}_x\text{H}_y$  in different electrolyte (pH=13.0) at an applied potential of 1.35 V vs RHE (Insert: Equivalent Circuit for the obtained EIS). (b) Equivalent circuit schematic diagram for  $\text{NiOOH}$  at 1.35 V vs RHE. (c) Corresponding parameters obtained from Figure S6a.

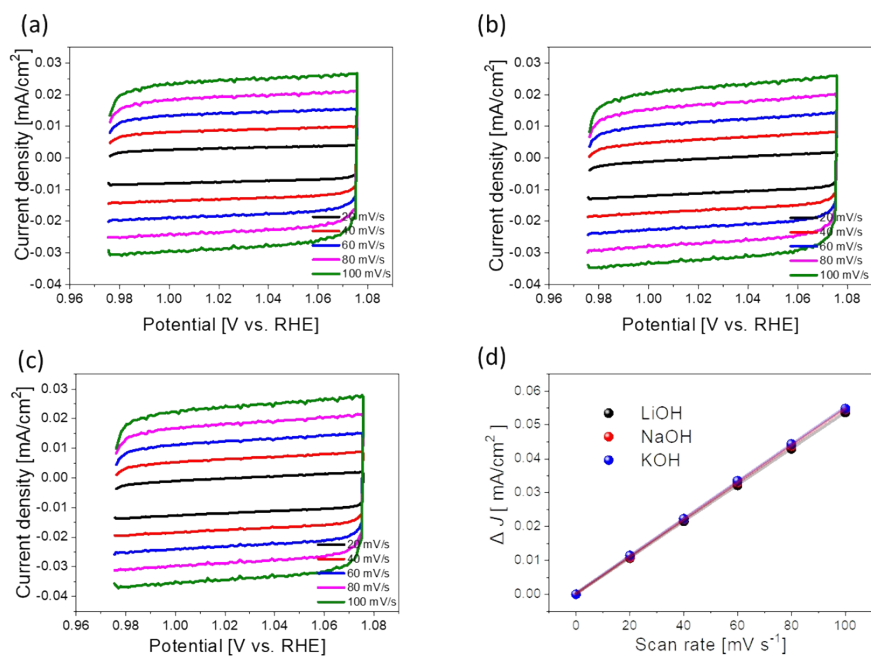

**Figure S7.** Typical cyclic voltammetry curves of  $\text{NiO}_x\text{H}_y$  with different scan rates in (a) LiOH, (b) NaOH, (c) KOH. (d) Plots showing the dependence of current density on the scan rate for the extraction of double layer capacitance.

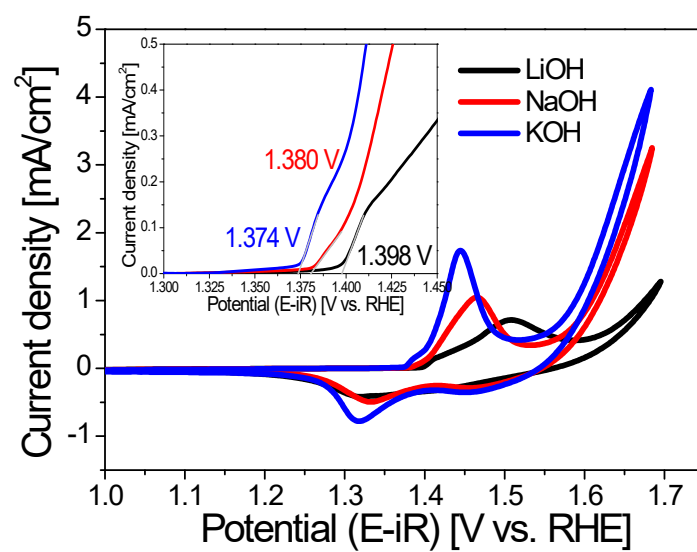

**Figure S8.** CV curves of  $\text{NiO}_x\text{H}_y$  at pH 13.0 in the region of oxygen evolution in different electrolytes at a scan rate of  $1 \text{ mV s}^{-1}$ .

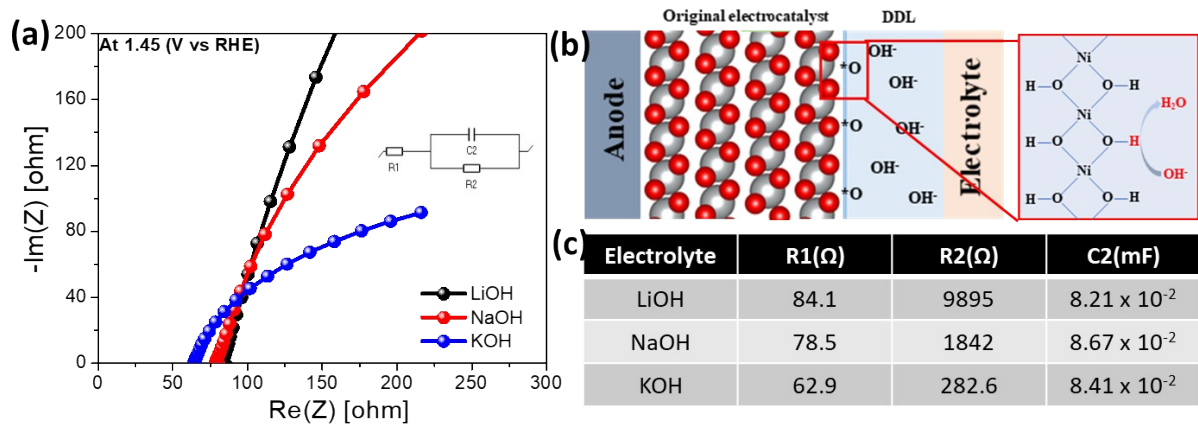

**Figure S9.** (a) EIS spectra of  $\text{NiO}_x\text{H}_y$  in different electrolytes (pH=13.0) at an applied potential of 1.45 V vs RHE. (b) Equivalent circuit schematic diagram for  $\text{NiO}_x\text{H}_y$  at 1.45 V vs RHE (DDL: Diffusion double layer). (c) Corresponding parameters obtained from Figure S6a.

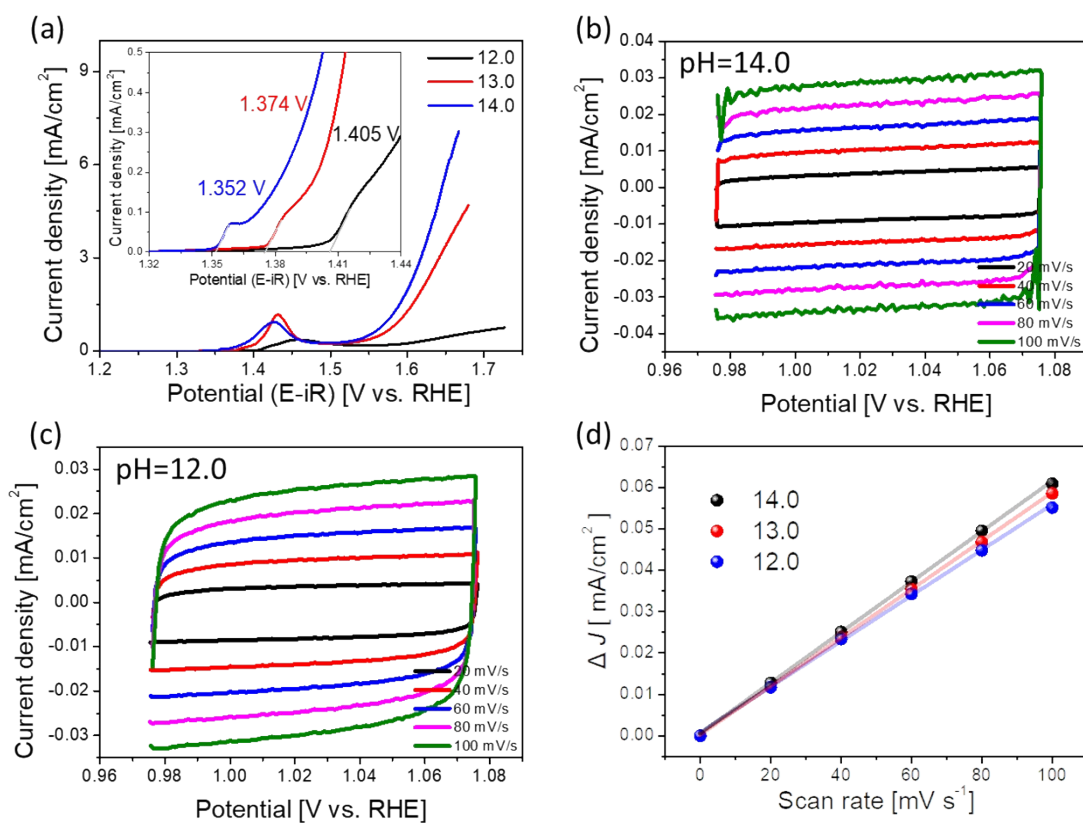

**Figure S10.** (a) Polarization curves of  $\text{NiO}_x\text{H}_y$  in KOH electrolyte with different pH values and activation potential of  $\text{Ni}^{2+}$  to  $\text{Ni}^{3+}$ . CV curves of  $\text{NiO}_x\text{H}_y$  at non-Faradic potential area in (b) pH =14.0 and (c) pH = 12.0 KOH electrolyte with different scan rates. (d) Plots showing the dependence of current density on the scan rate for the extraction of double layer capacitance performed on  $\text{NiO}_x\text{H}_y$  in different pH of KOH electrolyte.

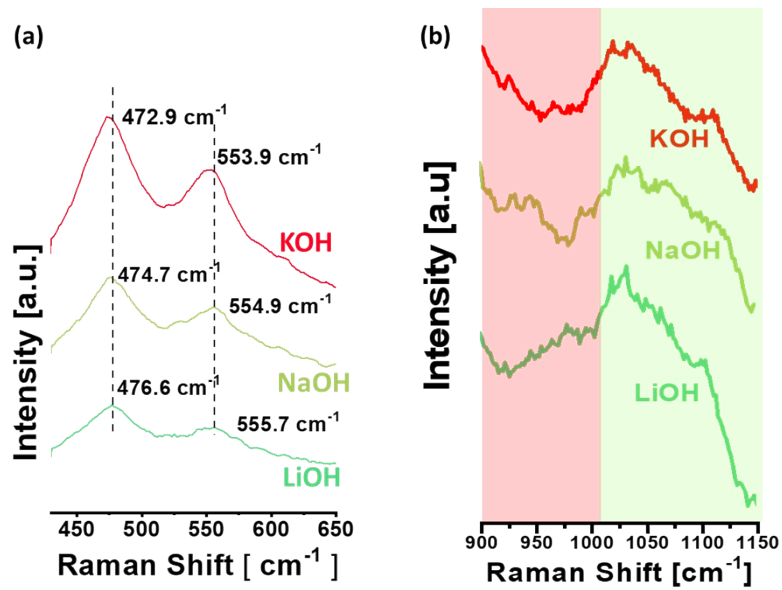

**Figure S11.** In-situ Raman spectra of NiO<sub>x</sub>H<sub>y</sub> in the wavenumber regions of (a) 430-650 cm<sup>-1</sup> and (b) 900-1150 cm<sup>-1</sup> acquired at 1.70 V vs RHE.

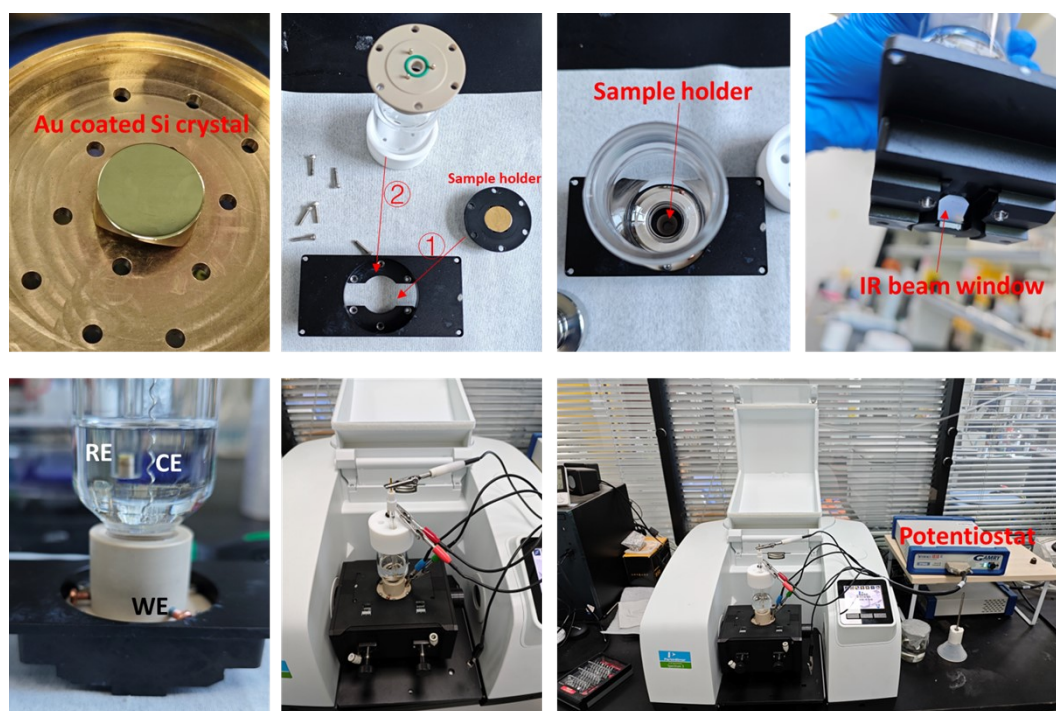

**Figure S12.** Photographs of in-situ ATR-SEIRAS spectra measurements.

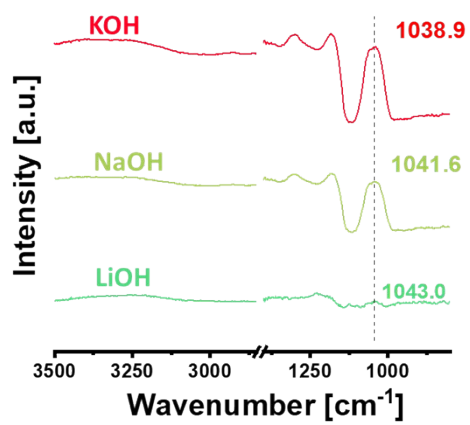

**Figure S13.** In-situ ATR-SEIRAS spectra of NiO<sub>x</sub>H<sub>y</sub> measured at 1.7 V vs RHE for 240 s.

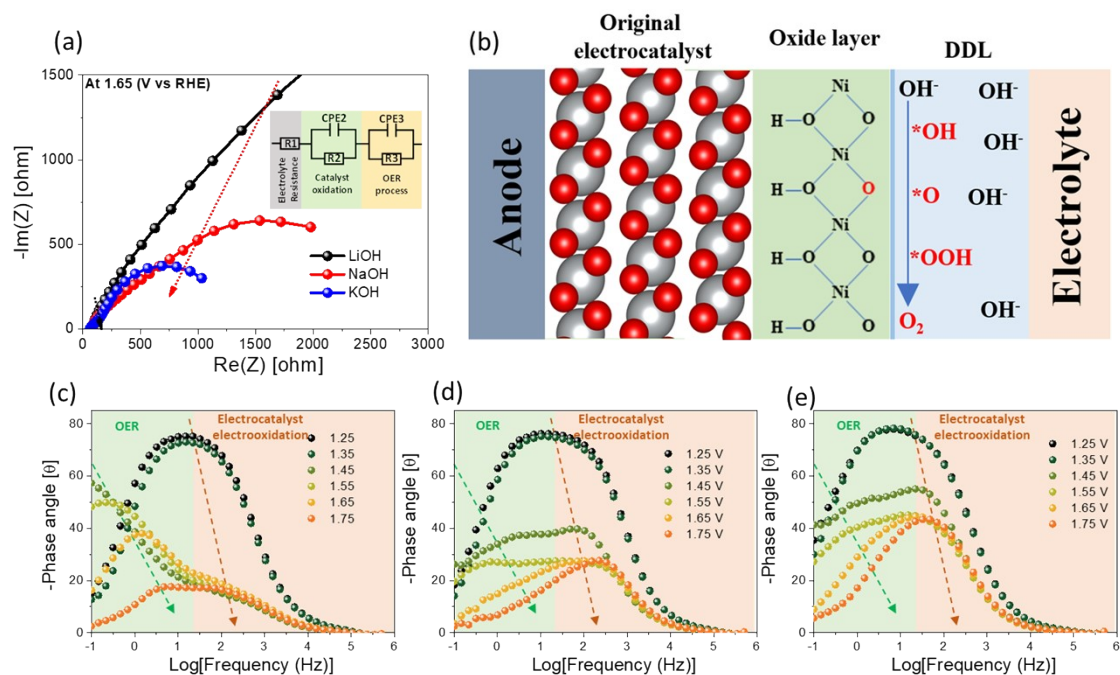

**Figure S14.** (a) EIS spectra of  $\text{NiO}_x\text{H}_y$  in the different electrolytes at an applied potential of 1.65 V vs RHE and the equivalent circuit insert. (b) Schematic illustration of the relationship between surface species and reactions for  $\text{NiO}_x\text{H}_y$  at a high potential range. Bode plots for  $\text{NiO}_x\text{H}_y$  at different potentials in (c) KOH, (d) NaOH, and (e) LiOH.

**Table S1.** Parameters obtained from Figure S14a.

| Electrolyte | R1( $\Omega$ ) | R2( $\Omega$ ) | C2(mF) | R3( $\Omega$ ) | C3(mF) |
|-------------|----------------|----------------|--------|----------------|--------|
| LiOH        | 82.4           | 534            | 0.108  | 6790           | 0.171  |
| NaOH        | 80.3           | 234            | 0.066  | 2337           | 0.332  |
| KOH         | 62.9           | 80.6           | 0.223  | 1105           | 0.552  |

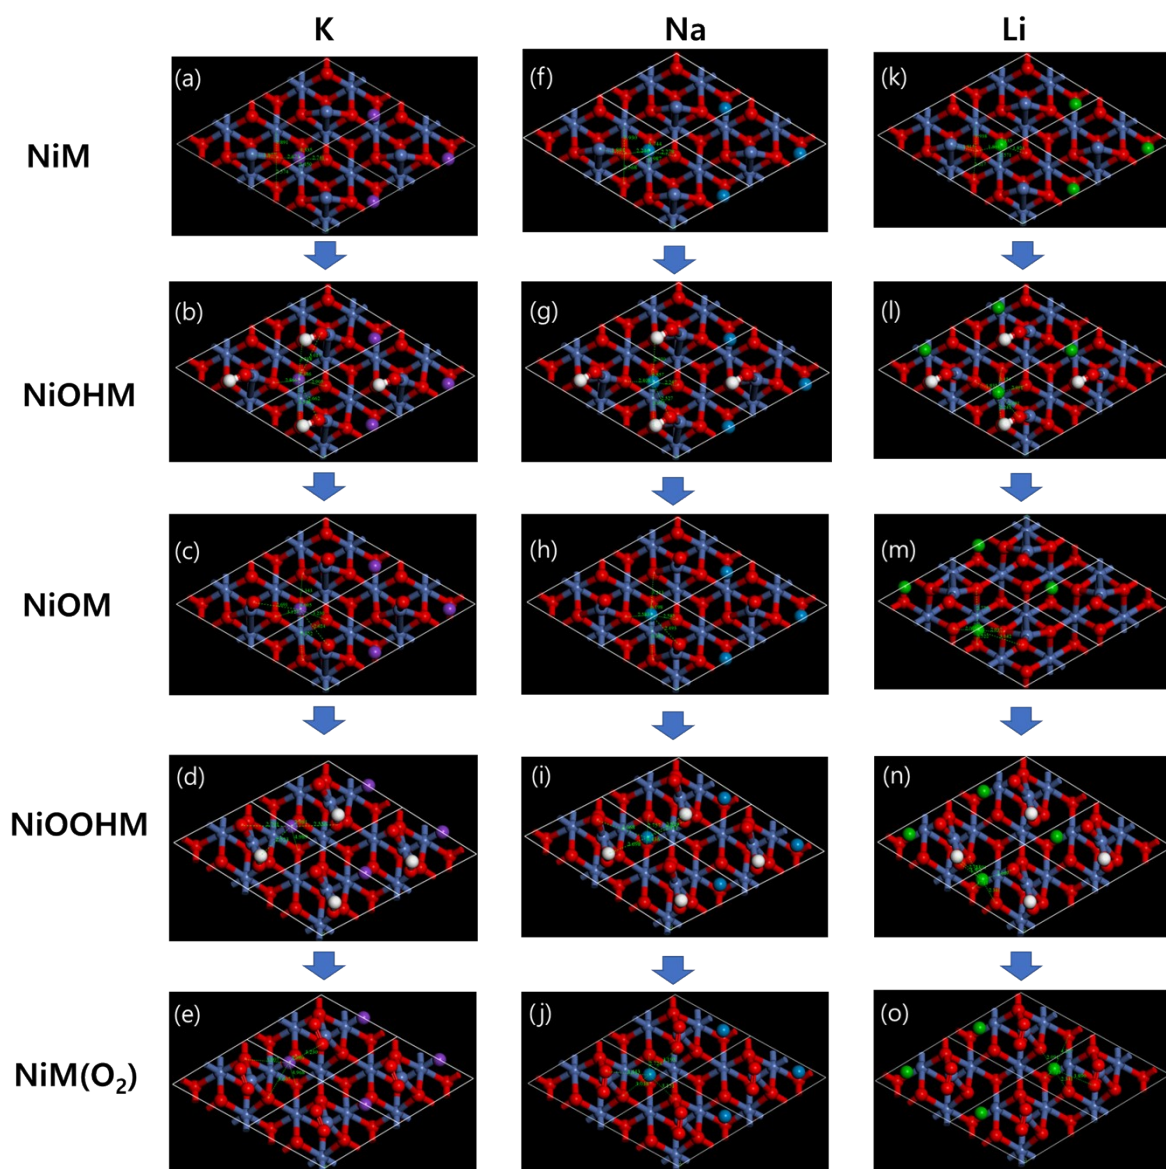

**Figure S15.** OER process proposed on Ni site of NiOOH with (a-e) K<sup>+</sup>, (f-j) Na<sup>+</sup>, (k-o) Li<sup>+</sup>. (Ni (gray), O (red), H (white), K (purple), Na (teal), and Li (green)).

**Table S2.** Fe concentration in 0.1 M KOH, 0.1 M NaOH, 0.1 M LiOH

| Electrolyte        | 0.1 M KOH   | 0.1 M NaOH  | 0.1 M LiOH  |
|--------------------|-------------|-------------|-------------|
| Concentration (Fe) | 0.00455 ppm | 0.00661 ppm | 0.00341 ppm |
